# Supplementary material
Source: PubMed Central journal article supplement (PMC6451612)
Supplement: ejhpharm-2016-000918supp001.pdf [file ejhpharm-2016-000918supp001.pdf]

**Stroke Pharmaceutical Care Plan (for GP + Community Pharmacist)**

| <b>PATIENT DETAILS</b>                               |                            | Admission Date                                                                                         | Discharge Date      |                           |                                                              |                          |          |
|------------------------------------------------------|----------------------------|--------------------------------------------------------------------------------------------------------|---------------------|---------------------------|--------------------------------------------------------------|--------------------------|----------|
| Surname                                              |                            | <b>Registered GP</b>                                                                                   |                     | <b>Community Pharmacy</b> |                                                              |                          |          |
| Forename                                             |                            | Name                                                                                                   | Name                |                           |                                                              |                          |          |
| Address                                              |                            | Surgery address                                                                                        |                     | Pharmacy address          |                                                              |                          |          |
| DOB                                                  |                            | Tel                                                                                                    | Tel                 |                           |                                                              |                          |          |
| CHI                                                  |                            | nhs e-mail                                                                                             | nhs e-mail          |                           |                                                              |                          |          |
| Tel                                                  |                            | <b>Patient lives</b> alone <input type="checkbox"/> others <input type="checkbox"/>                    | <b>Consultant</b>   |                           |                                                              |                          |          |
| <b>Acute Hospital</b>                                |                            | <b>Rehabilitation Unit</b>                                                                             |                     |                           |                                                              |                          |          |
| <b>Referring pharmacist</b>                          |                            | <b>Patient has carer</b> <input type="checkbox"/> <b>Helps with medicines</b> <input type="checkbox"/> |                     |                           |                                                              |                          |          |
| Name                                                 |                            | Name                                                                                                   |                     |                           |                                                              |                          |          |
| Tel                                                  |                            | Contact number                                                                                         |                     |                           |                                                              |                          |          |
| email                                                |                            | <b>Method of collecting prescription from pharmacy</b>                                                 |                     |                           |                                                              |                          |          |
| <b>Type of stroke</b>                                |                            | <b>Relevant medical history</b>                                                                        |                     |                           |                                                              |                          |          |
| TIA                                                  | <input type="checkbox"/>   | Date                                                                                                   | Problem description | Date                      |                                                              |                          |          |
| ischaemic                                            | <input type="checkbox"/>   |                                                                                                        |                     |                           |                                                              |                          |          |
| haemorrhagic                                         | <input type="checkbox"/>   |                                                                                                        |                     |                           |                                                              |                          |          |
| Other                                                | <input type="checkbox"/>   |                                                                                                        |                     |                           |                                                              |                          |          |
| <b>Known drug allergies / adverse drug reactions</b> |                            |                                                                                                        |                     |                           |                                                              |                          |          |
| <b>Current medication</b>                            |                            |                                                                                                        |                     |                           |                                                              |                          |          |
| Medicine (including form)                            | Strength                   | Dose                                                                                                   | Frequency           | Indication                | Duration                                                     | New (✓)                  | Comments |
|                                                      |                            |                                                                                                        |                     |                           |                                                              | <input type="checkbox"/> |          |
|                                                      |                            |                                                                                                        |                     |                           |                                                              | <input type="checkbox"/> |          |
|                                                      |                            |                                                                                                        |                     |                           |                                                              | <input type="checkbox"/> |          |
|                                                      |                            |                                                                                                        |                     |                           |                                                              | <input type="checkbox"/> |          |
|                                                      |                            |                                                                                                        |                     |                           |                                                              | <input type="checkbox"/> |          |
|                                                      |                            |                                                                                                        |                     |                           |                                                              | <input type="checkbox"/> |          |
|                                                      |                            |                                                                                                        |                     |                           |                                                              | <input type="checkbox"/> |          |
|                                                      |                            |                                                                                                        |                     |                           |                                                              | <input type="checkbox"/> |          |
|                                                      |                            |                                                                                                        |                     |                           |                                                              | <input type="checkbox"/> |          |
|                                                      |                            |                                                                                                        |                     |                           |                                                              | <input type="checkbox"/> |          |
|                                                      |                            |                                                                                                        |                     |                           |                                                              | <input type="checkbox"/> |          |
|                                                      |                            |                                                                                                        |                     |                           |                                                              | <input type="checkbox"/> |          |
|                                                      |                            |                                                                                                        |                     |                           |                                                              | <input type="checkbox"/> |          |
| <b>Medicines that have stopped</b>                   | <b>Reason for stopping</b> |                                                                                                        |                     |                           | <b>Medicines that are not prescribed eg herbal medicines</b> |                          |          |
|                                                      |                            |                                                                                                        |                     |                           |                                                              |                          |          |
